# Supplementary material
Source: PubMed Central journal article supplement (PMC3292199)

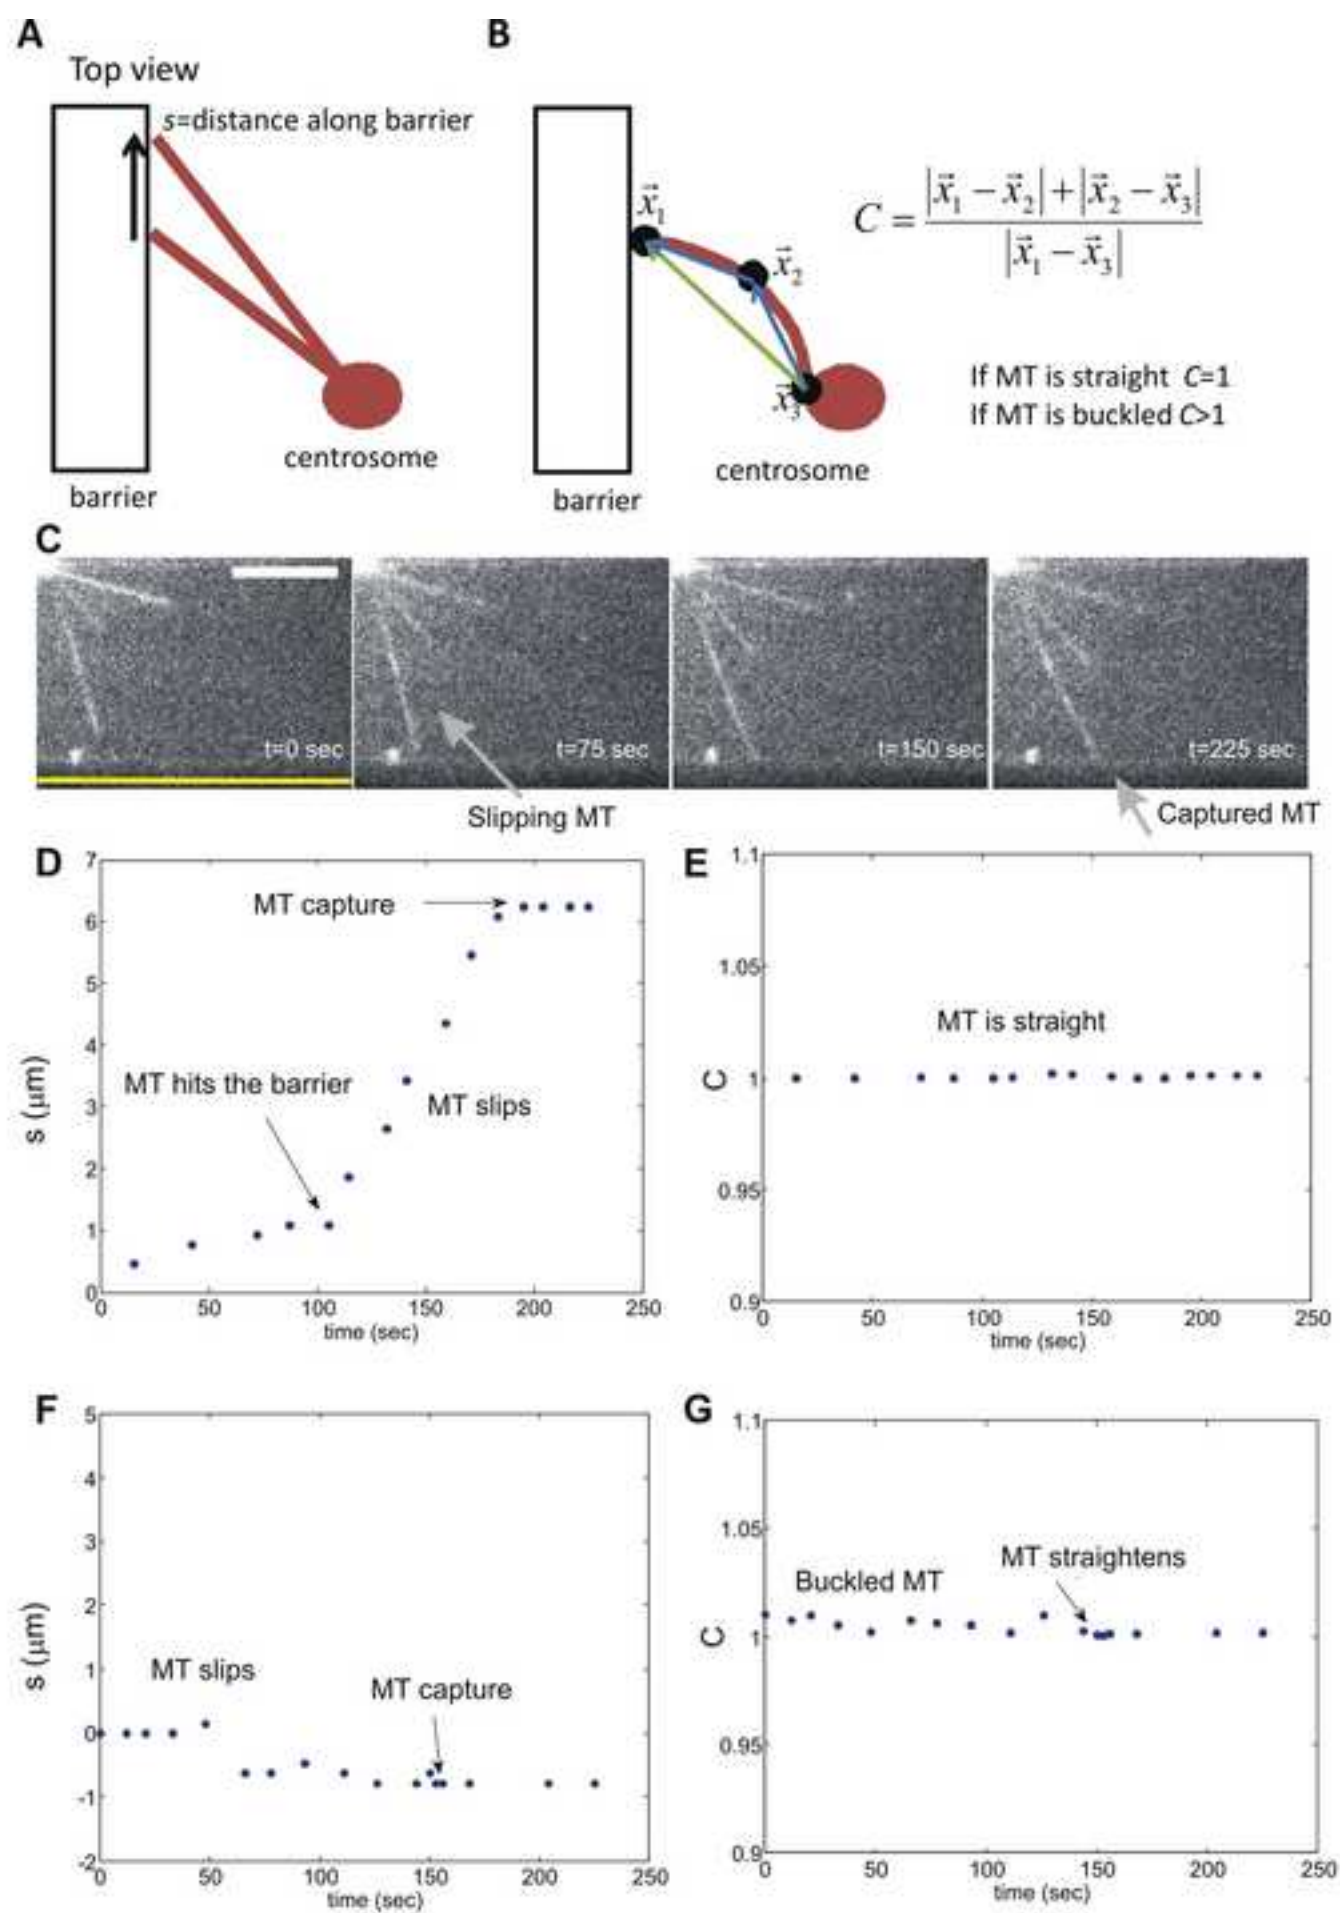

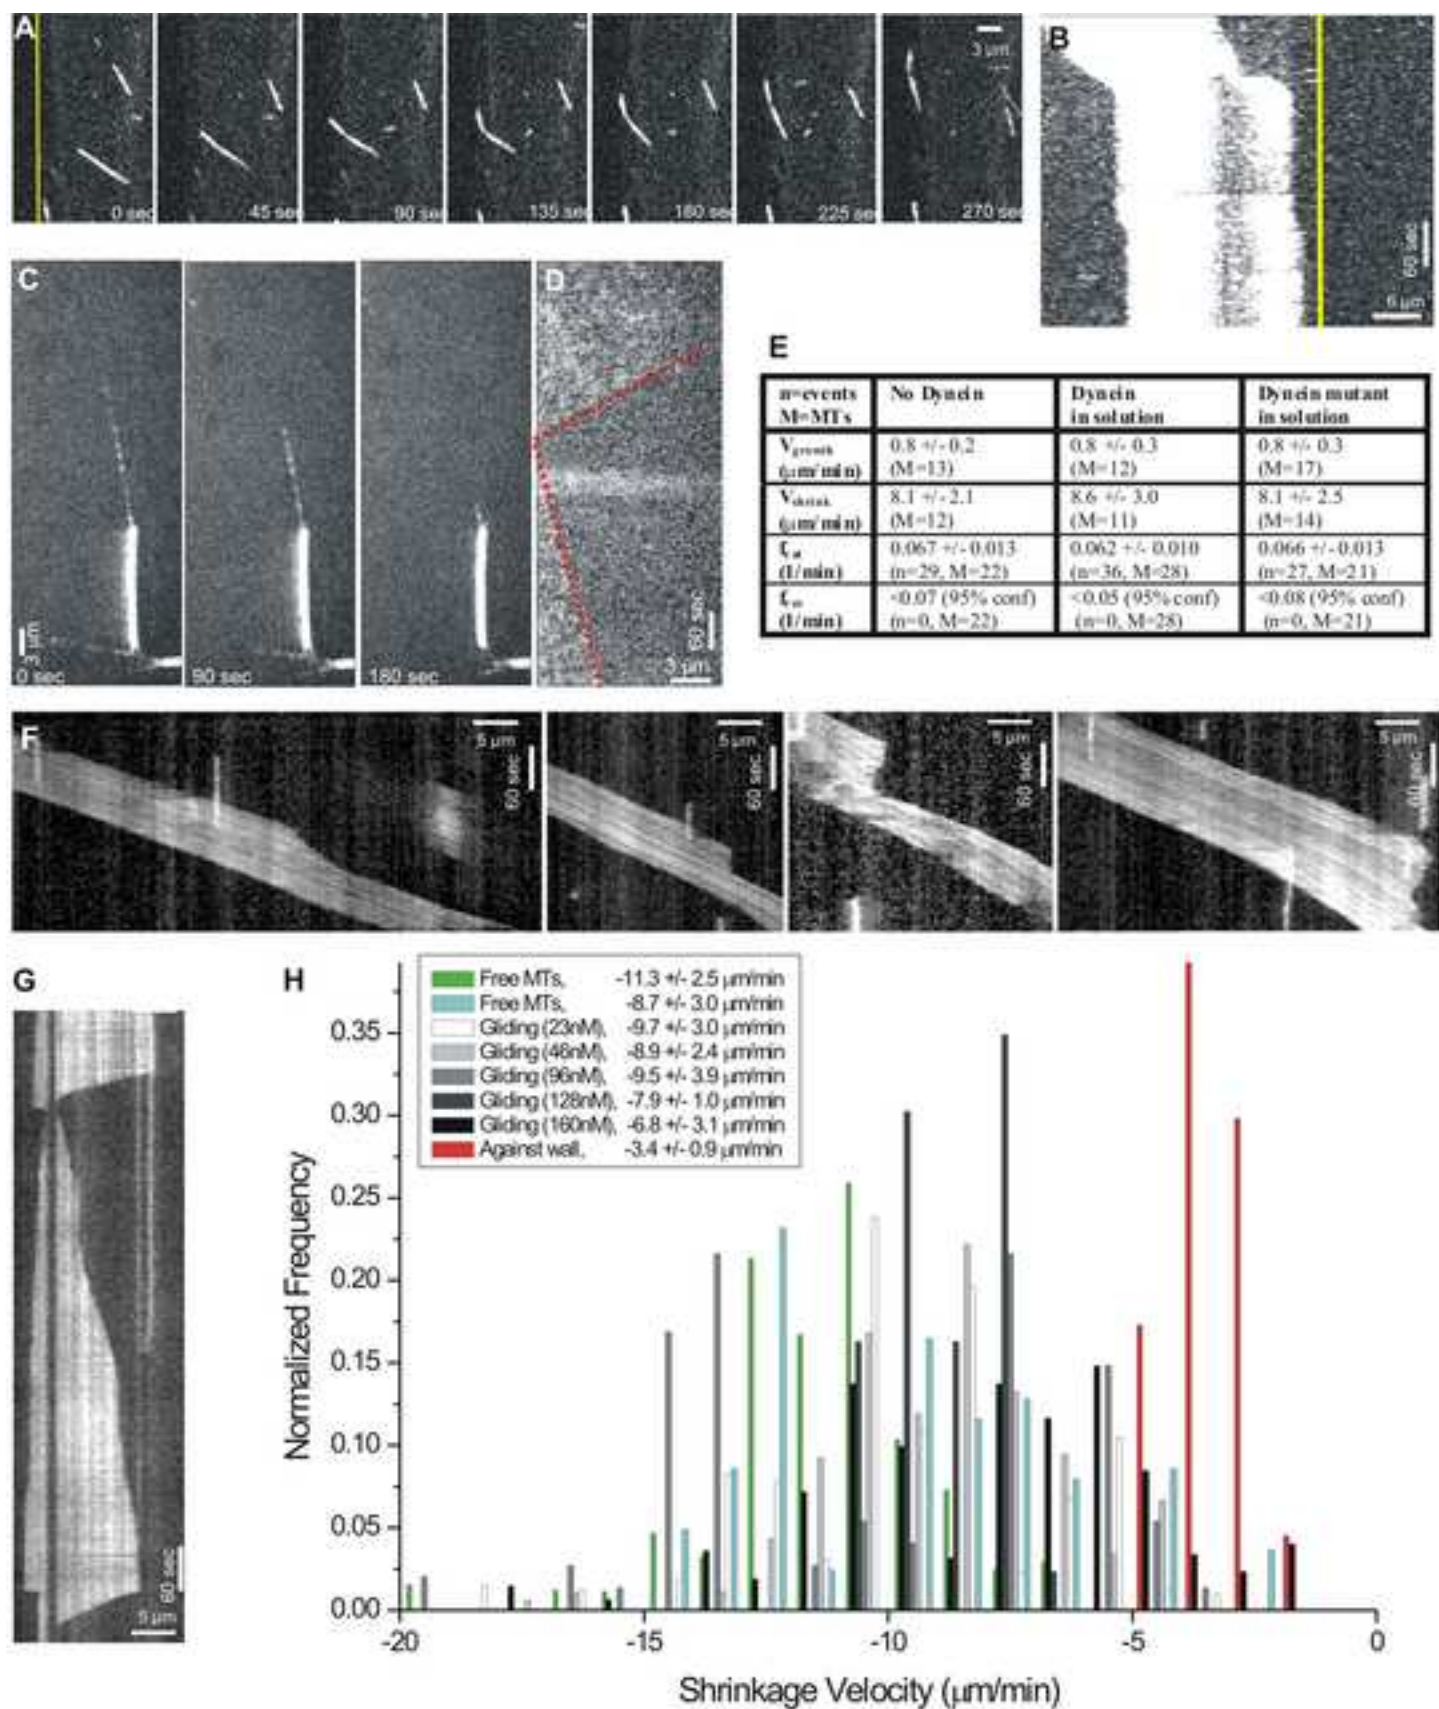

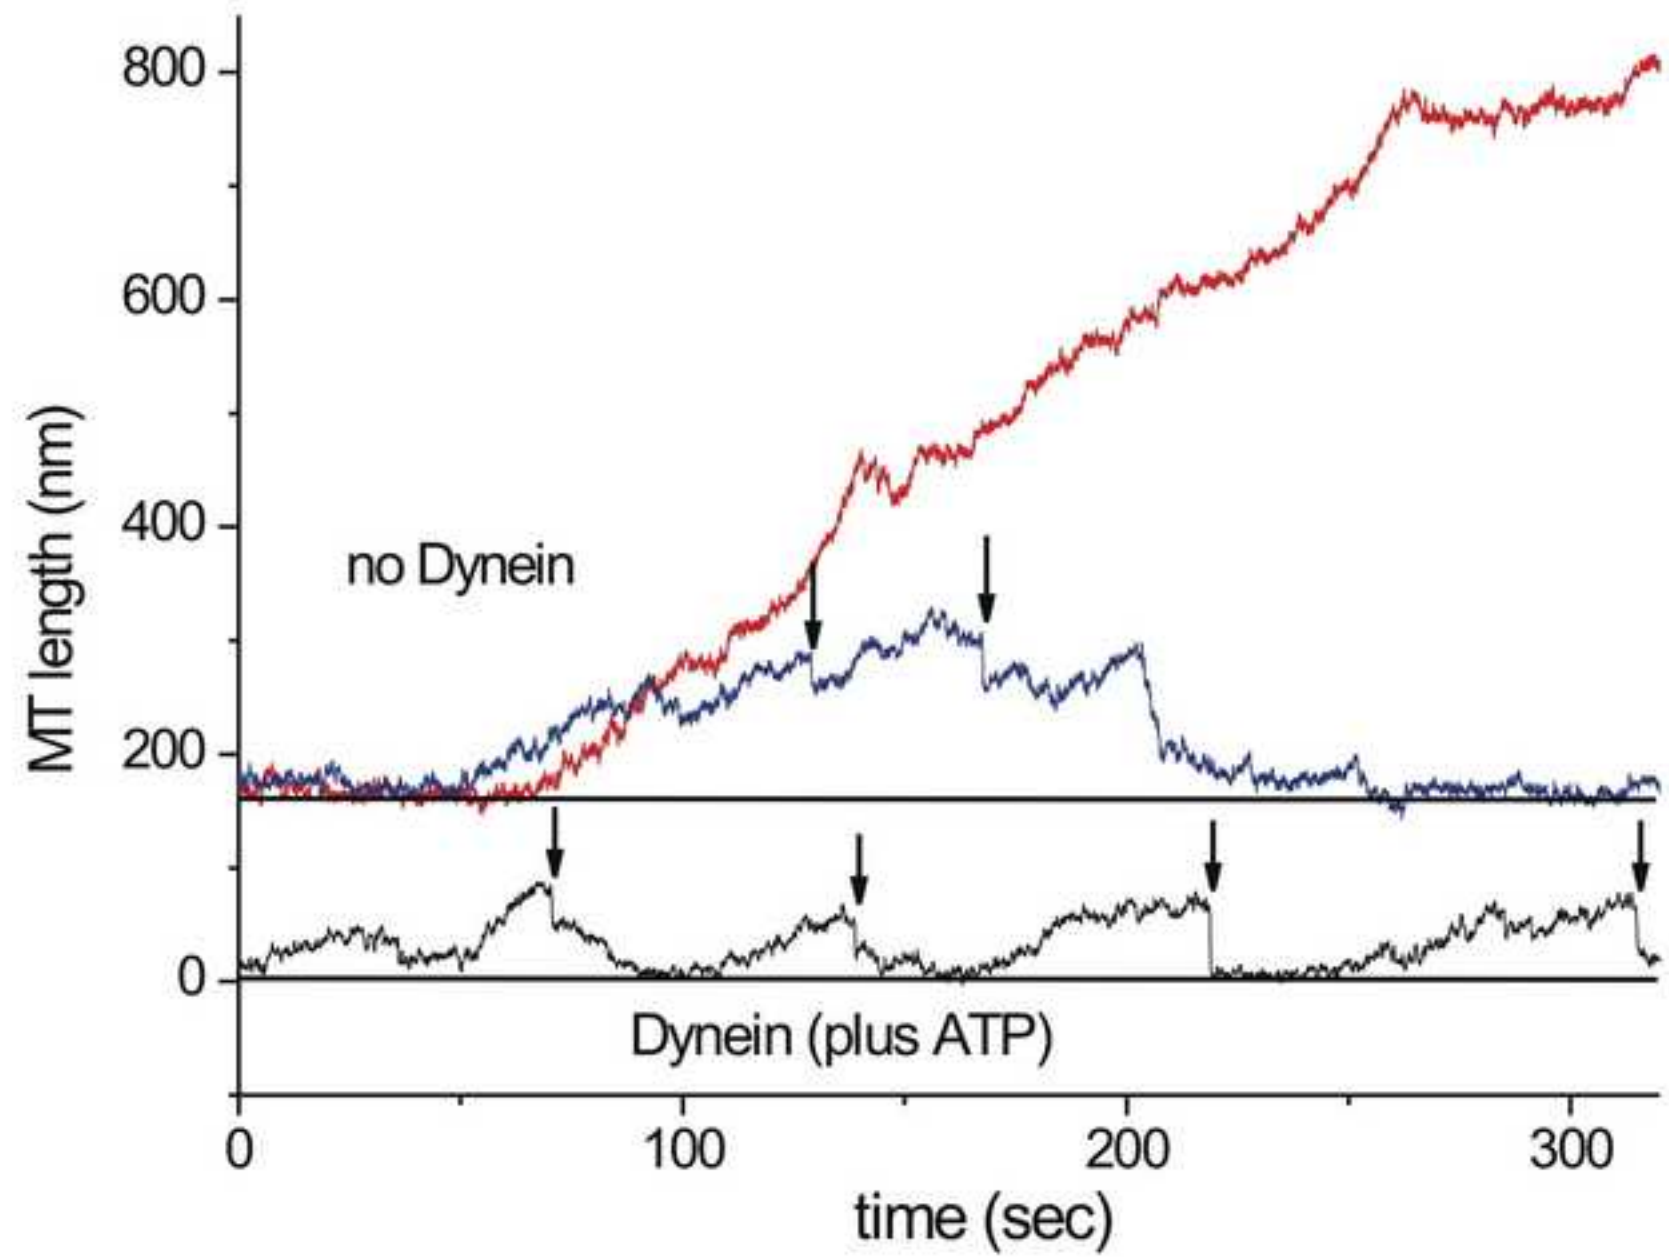

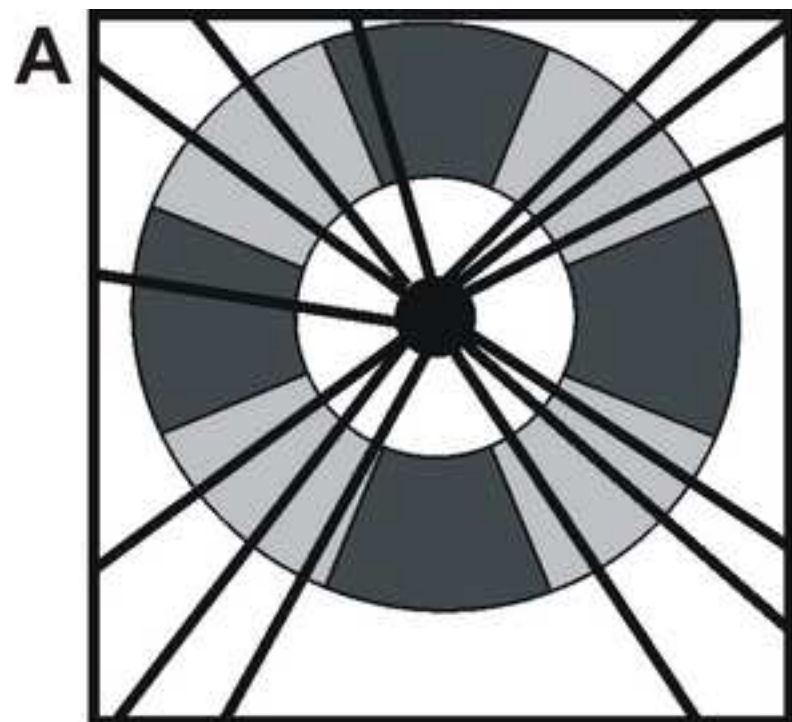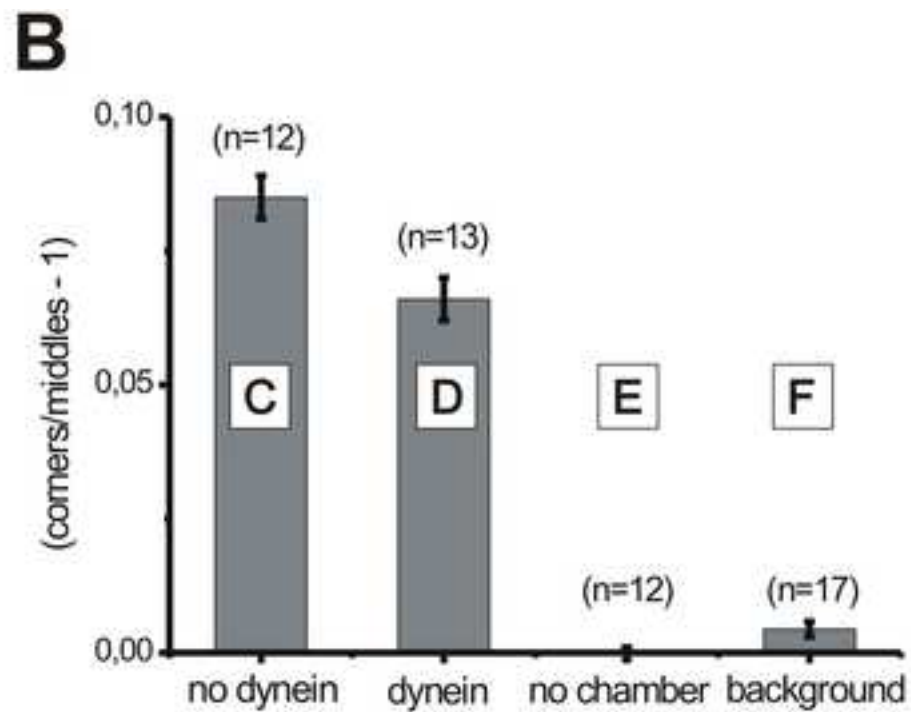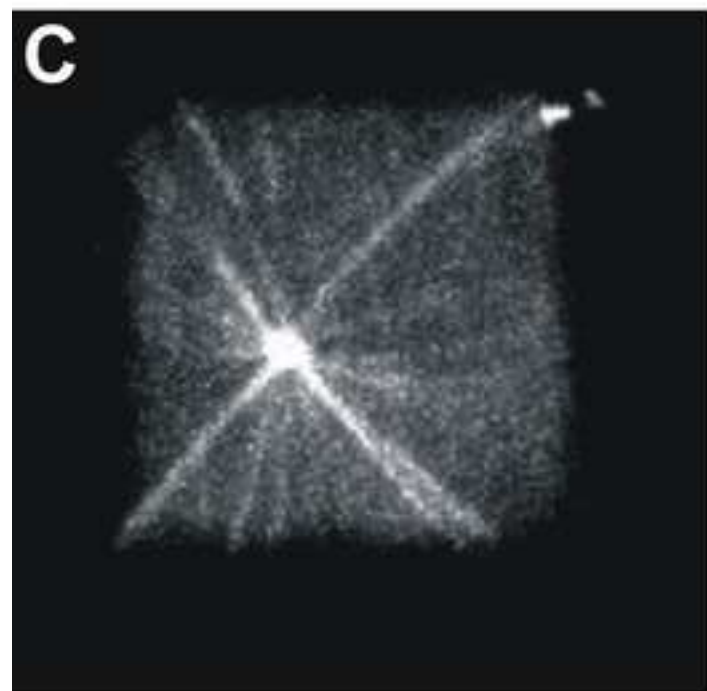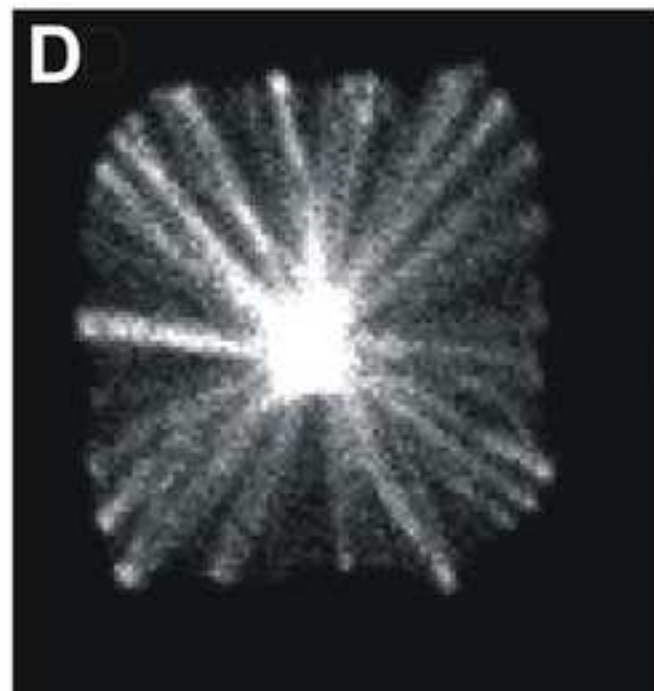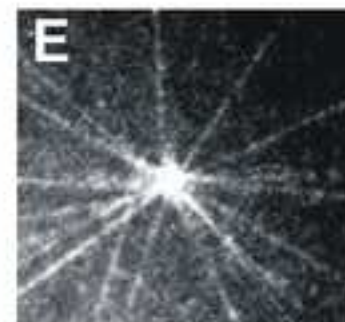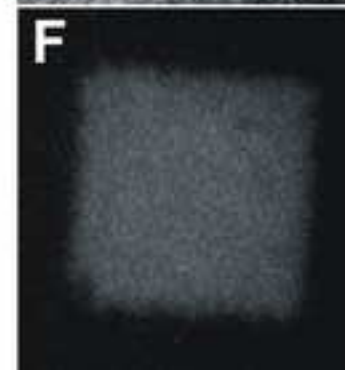

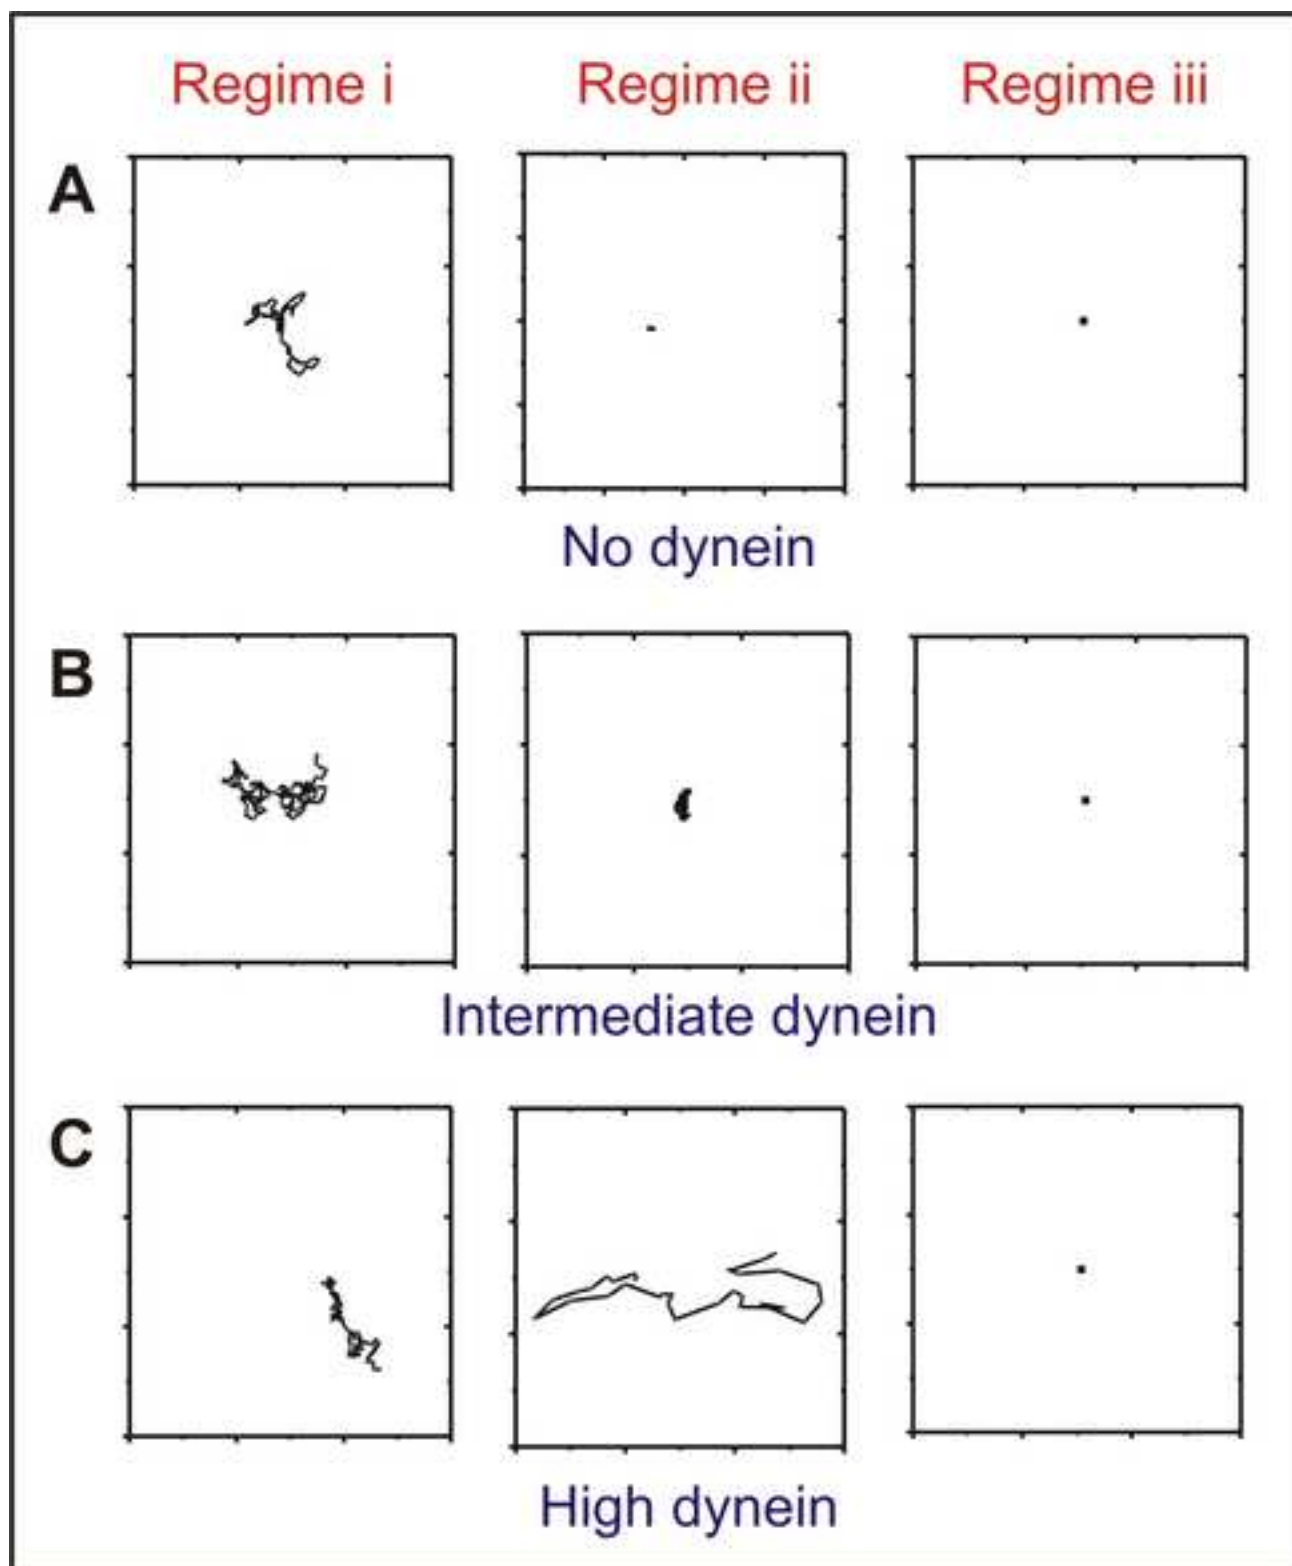

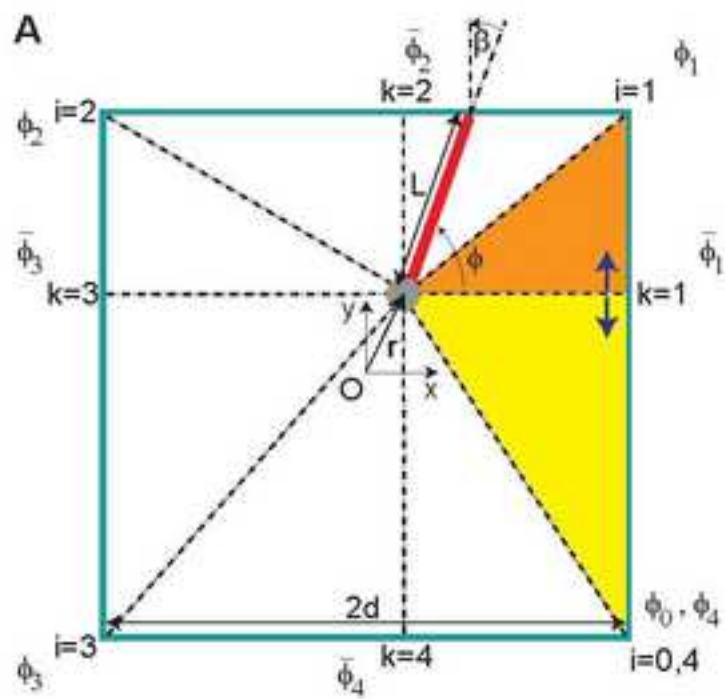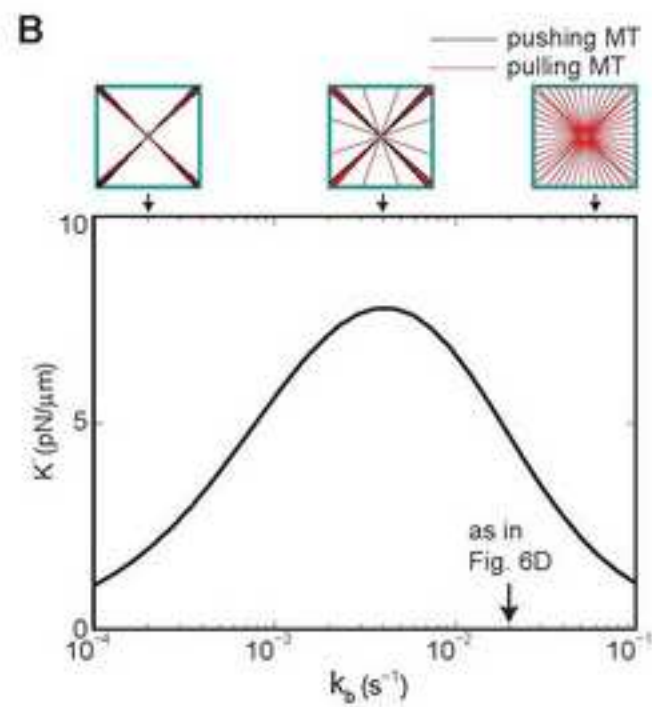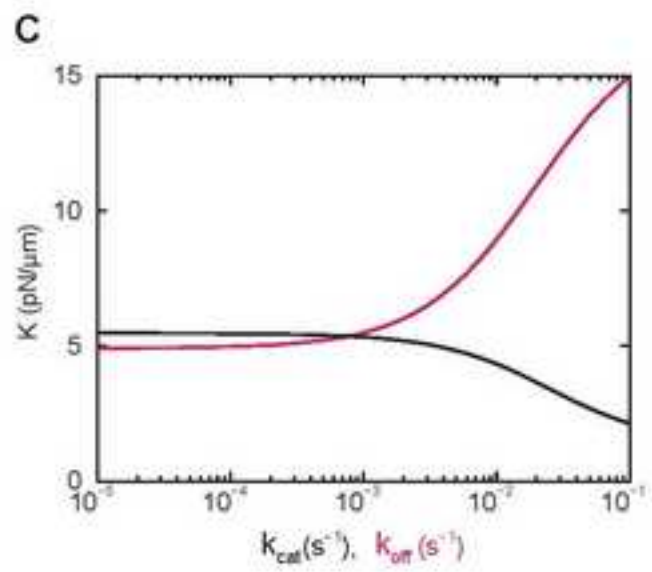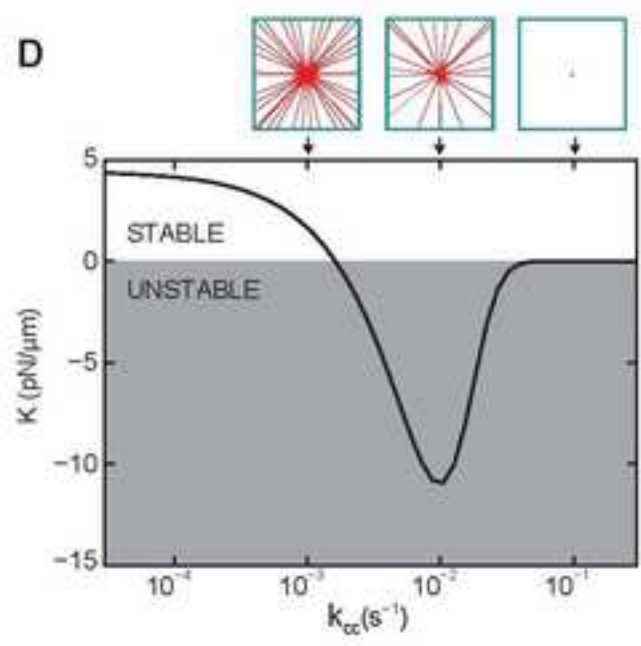

Supplement: NIHMS355069-supplement-08.pdf [file NIHMS355069-supplement-08.pdf]
